# Supplementary material for: Application of OpenArray Technology to Assess Changes in the Expression of Functionally Significant Genes in the Substantia Nigra of Mice in a Model of Parkinson’s Disease
Source: MDPI journal article supplement (doi:10.3390/genes14122202), 2023-12-12
Supplement: s1 [file s1]

**Table S1.** Genes and their target names on PCR chips for Open Array technology

| <b>No</b> | <b>Gene</b>    | <b>Target name</b> | <b>Reporter</b> |
|-----------|----------------|--------------------|-----------------|
| 1         | <i>Xprnep1</i> | Mm00460040_m1      | FAM             |
| 2         | <i>Aars</i>    | Mm00507627_m1      | FAM             |
| 3         | <i>Gapvd1</i>  | Mm01336858_m1      | FAM             |
| 4         | <i>Osbp</i>    | Mm01205197_m1      | FAM             |
| 5         | <i>Gapdh</i>   | Mm99999915_g1      | FAM             |
| 6         | <i>Sdha</i>    | Mm01352366_m1      | FAM             |
| 7         | <i>Rps27a</i>  | Mm01180369_g1      | FAM             |
| 8         | <i>Ube2d2a</i> | Mm00785931_s1      | FAM             |
| 9         | <i>Cyc1</i>    | Mm00470540_m1      | FAM             |
| 10        | <i>Rpl13</i>   | Mm02526700_g1      | FAM             |
| 11        | <i>Gfap</i>    | Mm01253033_m1      | FAM             |
| 12        | <i>Hprt</i>    | Mm03024075_m1      | FAM             |
| 13        | <i>Th</i>      | Mm00447557_m1      | FAM             |
| 14        | <i>Ddc</i>     | Mm00516688_m1      | FAM             |
| 15        | <i>Dbh</i>     | Mm00460472_m1      | FAM             |
| 16        | <i>Pnmt</i>    | Mm00476993_m1      | FAM             |
| 17        | <i>Maoa</i>    | Mm00558004_m1      | FAM             |
| 18        | <i>Maob</i>    | Mm00555412_m1      | FAM             |
| 19        | <i>Comt</i>    | Mm00514377_m1      | FAM             |
| 20        | <i>Slc6a3</i>  | Mm00438388_m1      | FAM             |
| 21        | <i>Slc18a1</i> | Mm00461868_m1      | FAM             |
| 22        | <i>Slc18a2</i> | Mm00553058_m1      | FAM             |
| 23        | <i>Drd1</i>    | Mm02620146_s1      | FAM             |
| 24        | <i>Drd2</i>    | Mm00438545_m1      | FAM             |
| 25        | <i>Drd3</i>    | Mm00432887_m1      | FAM             |
| 26        | <i>Drd4</i>    | Mm00432893_m1      | FAM             |
| 27        | <i>Drd5</i>    | Mm04210376_s1      | FAM             |
| 28        | <i>Kif1a</i>   | Mm00492863_m1      | FAM             |
| 29        | <i>Kif1b</i>   | Mm00801813_m1      | FAM             |
| 30        | <i>Kif5a</i>   | Mm00515265_m1      | FAM             |
| 31        | <i>Kif2c</i>   | Mm00728630_s1      | FAM             |
| 32        | <i>Dync1h1</i> | Mm00466548_m1      | FAM             |
| 33        | <i>Dynll1</i>  | Mm00850282_g1      | FAM             |
| 34        | <i>Dctn1</i>   | Mm01184845_m1      | FAM             |
| 35        | <i>Mapt</i>    | Mm00521988_m1      | FAM             |
| 36        | <i>Map2</i>    | Mm00485231_m1      | FAM             |
| 37        | <i>Mark2</i>   | Mm01220150_g1      | FAM             |
| 38        | <i>Tubb3</i>   | Mm00727586_s1      | FAM             |
| 39        | <i>Tuba1a</i>  | Mm00846967_g1      | FAM             |
| 40        | <i>Sncg</i>    | Mm01188700_m1      | FAM             |
| 41        | <i>Syn1</i>    | Mm00449772_m1      | FAM             |
| 42        | <i>Stx1a</i>   | Mm00444008_m1      | FAM             |
| 43        | <i>Syt1</i>    | Mm00436858_m1      | FAM             |

|    |                |               |     |
|----|----------------|---------------|-----|
| 44 | <i>Syt11</i>   | Mm00444517_m1 | FAM |
| 45 | <i>Rab5a</i>   | Mm00727887_s1 | FAM |
| 46 | <i>Rab7</i>    | Mm00784318_sH | FAM |
| 47 | <i>Nsf</i>     | Mm00435390_m1 | FAM |
| 48 | <i>Dnm1l</i>   | Mm01342903_m1 | FAM |
| 49 | <i>Vps35</i>   | Mm00458167_m1 | FAM |
| 50 | <i>Sod1</i>    | Mm01344233_g1 | FAM |
| 51 | <i>Gpx1</i>    | Mm00656767_g1 | FAM |
| 52 | <i>Gsr</i>     | Mm00439154_m1 | FAM |
| 53 | <i>Txnrd1</i>  | Mm00443675_m1 | FAM |
| 54 | <i>Nos1</i>    | Mm01208059_m1 | FAM |
| 55 | <i>Prdx1</i>   | Mm01621996_s1 | FAM |
| 56 | <i>Nfe2l2</i>  | Mm00477784_m1 | FAM |
| 57 | <i>Agtr2</i>   | Mm00431727_g1 | FAM |
| 58 | <i>Keap1</i>   | Mm00497268_m1 | FAM |
| 59 | <i>Sigmar1</i> | Mm01223547_g1 | FAM |
| 60 | <i>Cacna1d</i> | Mm01209927_g1 | FAM |
| 61 | <i>Trpm2</i>   | Mm00663098_m1 | FAM |
| 62 | <i>Park2</i>   | Mm01323528_m1 | FAM |
| 63 | <i>Ube2n</i>   | Mm00779119_s1 | FAM |
| 64 | <i>Uba3</i>    | Mm00495866_m1 | FAM |
| 65 | <i>Psmb4</i>   | Mm01263563_m1 | FAM |
| 66 | <i>Psmc3</i>   | Mm00477177_m1 | FAM |
| 67 | <i>Psmc4</i>   | Mm01263490_m1 | FAM |
| 68 | <i>Usp47</i>   | Mm00659716_m1 | FAM |
| 69 | <i>Ubb</i>     | Mm01622233_g1 | FAM |
| 70 | <i>Bdnf</i>    | Mm04230607_s1 | FAM |
| 71 | <i>Gdnf</i>    | Mm00599849_m1 | FAM |
| 72 | <i>Ngf</i>     | Mm00443039_m1 | FAM |
| 73 | <i>Vegfa</i>   | Mm00437306_m1 | FAM |
| 74 | <i>Cdnf</i>    | Mm00617407_m1 | FAM |
| 75 | <i>Ntrk2</i>   | Mm00435422_m1 | FAM |
| 76 | <i>Ntrk1</i>   | Mm01219406_m1 | FAM |
| 77 | <i>Ngfr</i>    | Mm00446296_m1 | FAM |
| 78 | <i>Nr4a2</i>   | Mm00443060_m1 | FAM |
| 79 | <i>Mmp3</i>    | Mm00440295_m1 | FAM |
| 80 | <i>Pitx3</i>   | Mm01194166_g1 | FAM |
| 81 | <i>Wnt11</i>   | Mm00437327_g1 | FAM |
| 82 | <i>Ctnnb1</i>  | Mm00483039_m1 | FAM |
| 83 | <i>Slc29a4</i> | Mm00525575_m1 | FAM |
| 84 | <i>Calb1</i>   | Mm00486647_m1 | FAM |
| 85 | <i>Ifng</i>    | Mm01168134_m1 | FAM |
| 86 | <i>Tgfb1</i>   | Mm01178820_m1 | FAM |
| 87 | <i>Akt1</i>    | Mm01331626_m1 | FAM |
| 88 | <i>Cnr1</i>    | Mm01212171_s1 | FAM |
| 89 | <i>Ptgs2</i>   | Mm00478374_m1 | FAM |
| 90 | <i>Clk1</i>    | Mm00438254_m1 | FAM |

|     |                |               |     |
|-----|----------------|---------------|-----|
| 91  | <i>Traf1</i>   | Mm00493827_m1 | FAM |
| 92  | <i>Cxcl11</i>  | Mm00444662_m1 | FAM |
| 93  | <i>Casp1</i>   | Mm00438023_m1 | FAM |
| 94  | <i>Casp3</i>   | Mm01195085_m1 | FAM |
| 95  | <i>Parp1</i>   | Mm01321084_m1 | FAM |
| 96  | <i>Aifm1</i>   | Mm00442548_m1 | FAM |
| 97  | <i>Bcl2l11</i> | Mm00437796_m1 | FAM |
| 98  | <i>Map3k5</i>  | Mm00434883_m1 | FAM |
| 99  | <i>Cib1</i>    | Mm00501944_m1 | FAM |
| 100 | <i>Trp53</i>   | Mm01731290_g1 | FAM |
| 101 | <i>Bax</i>     | Mm00432051_m1 | FAM |
| 102 | <i>Fos</i>     | Mm00487425_m1 | FAM |
| 103 | <i>Mapk8</i>   | Mm00489514_m1 | FAM |
| 104 | <i>Lamp2</i>   | Mm00495267_m1 | FAM |
| 105 | <i>Atg16l1</i> | Mm00513085_m1 | FAM |
| 106 | <i>Atg5</i>    | Mm01187303_m1 | FAM |
| 107 | <i>Capn1</i>   | Mm00482964_m1 | FAM |
| 108 | <i>Tnf</i>     | Mm00443258_m1 | FAM |
| 109 | <i>Ctsb</i>    | Mm01310506_m1 | FAM |
| 110 | <i>Ern2</i>    | Mm00469005_m1 | FAM |
| 111 | <i>Eif2ak3</i> | Mm00438700_m1 | FAM |
| 112 | <i>Atf6</i>    | Mm01295319_m1 | FAM |
